# Supplementary material for: Quantifying heterogeneity in individual participant data meta-analysis with binary outcomes
Source: PubMed Central journal article supplement (PMC5718085; doi:10.1186/s13643-017-0630-4), 2017-12-06
Supplement: 13643_2017_630_MOESM1_ESM.pdf [file 13643_2017_630_MOESM1_ESM.pdf]

Table S1: The Median (IQR) of the estimated  $\tau^2$  when no effect modification was present.

| $\tau^2$ | Prevalence | Number<br>of studies | $\tau_{two-stage}^2$ | $\tau_{one-stage}^2$ |
|----------|------------|----------------------|----------------------|----------------------|
| 0.5      | 30%        | 15                   | 0.06 (0.26)          | 0.21 (0.35)          |
| 1.0      | 30%        | 15                   | 0.47 (0.65)          | 0.84 (0.83)          |
| 1.5      | 30%        | 15                   | 0.96 (1.08)          | 2.00 (1.67)          |
| 0.5      | 70%        | 15                   | 0.01 (0.20)          | 0.18 (0.35)          |
| 1.0      | 70%        | 15                   | 0.41 (0.67)          | 0.84 (0.79)          |
| 1.5      | 70%        | 15                   | 0.89 (1.01)          | 1.92 (1.67)          |
| 0.5      | 30%        | 30                   | 0.07 (0.20)          | 0.20 (0.26)          |
| 1.0      | 30%        | 30                   | 0.51 (0.48)          | 0.86 (0.57)          |
| 1.5      | 30%        | 30                   | 1.03 (0.73)          | 2.08 (1.15)          |
| 0.5      | 70%        | 30                   | 0.04 (0.15)          | 0.20 (0.26)          |
| 1.0      | 70%        | 30                   | 0.46 (0.48)          | 0.89 (0.63)          |
| 1.5      | 70%        | 30                   | 0.98 (0.71)          | 2.13 (1.17)          |

Table S2: Sensitivity of heterogeneity measures<sup>[1]</sup> to accounting for effect modification when prevalence of the outcome was 70%. Median (IQR) was presented.

| $\tau^2$ | Number of studies | Strength of effect modification <sup>[2]</sup> | Two-stage approach                              |                                                 | One-stage approach                              |                                                 |
|----------|-------------------|------------------------------------------------|-------------------------------------------------|-------------------------------------------------|-------------------------------------------------|-------------------------------------------------|
|          |                   |                                                | $\frac{I_{e\text{mod}}^2}{I_{e\text{crude}}^2}$ | $\frac{R_{e\text{mod}}^2}{R_{e\text{crude}}^2}$ | $\frac{I_{e\text{mod}}^2}{I_{e\text{crude}}^2}$ | $\frac{R_{e\text{mod}}^2}{R_{e\text{crude}}^2}$ |
| 0.5      | 15                | Weak                                           | 1.00 (0.01)                                     | 1.00 (0.01)                                     | 0.84 (0.39)                                     | 0.83 (0.17)                                     |
| 1.0      | 15                | Weak                                           | 0.85 (1.00)                                     | 0.94 (0.34)                                     | 0.90 (0.18)                                     | 0.81 (0.17)                                     |
| 1.5      | 15                | Weak                                           | 0.54 (1.00)                                     | 0.71 (0.50)                                     | 0.90 (0.18)                                     | 0.79 (0.16)                                     |
| 0.5      | 15                | Moderate                                       | 1.00 (0.01)                                     | 1.00 (0.01)                                     | 0.31 (0.47)                                     | 0.87 (0.19)                                     |
| 1.0      | 15                | Moderate                                       | 1.00 (0.66)                                     | 1.00 (0.23)                                     | 0.41 (0.38)                                     | 0.90 (0.23)                                     |
| 1.5      | 15                | Moderate                                       | 0.91 (0.96)                                     | 0.97 (0.32)                                     | 0.44 (0.37)                                     | 0.97 (0.31)                                     |
| 0.5      | 15                | Strong                                         | 1.00 (0.01)                                     | 1.00 (0.01)                                     | 0.01 (0.01)                                     | 0.89 (0.19)                                     |
| 1.0      | 15                | Strong                                         | 1.00 (0.01)                                     | 1.00 (0.01)                                     | 0.01 (0.15)                                     | 0.95 (0.30)                                     |
| 1.5      | 15                | Strong                                         | 1.00 (0.12)                                     | 1.00 (0.10)                                     | 0.06 (0.21)                                     | 1.05 (0.49)                                     |
| 0.5      | 30                | Weak                                           | 1.00 (0.01)                                     | 1.00 (0.01)                                     | 0.86 (0.32)                                     | 0.84 (0.12)                                     |
| 1.0      | 30                | Weak                                           | 0.34 (1.00)                                     | 0.78 (0.39)                                     | 0.90 (0.12)                                     | 0.80 (0.10)                                     |
| 1.5      | 30                | Weak                                           | 0.24 (0.71)                                     | 0.62 (0.33)                                     | 0.89 (0.12)                                     | 0.78 (0.11)                                     |
| 0.5      | 30                | Moderate                                       | 1.00 (0.01)                                     | 1.00 (0.01)                                     | 0.28 (0.31)                                     | 0.87 (0.16)                                     |
| 1.0      | 30                | Moderate                                       | 1.00 (1.00)                                     | 1.00 (0.24)                                     | 0.40 (0.25)                                     | 0.92 (0.19)                                     |
| 1.5      | 30                | Moderate                                       | 0.69 (1.00)                                     | 0.85 (0.35)                                     | 0.43 (0.28)                                     | 1.00 (0.22)                                     |
| 0.5      | 30                | Strong                                         | 1.00 (0.01)                                     | 1.00 (0.01)                                     | 0.01 (0.05)                                     | 0.88 (0.16)                                     |
| 1.0      | 30                | Strong                                         | 1.00 (0.05)                                     | 1.00 (0.02)                                     | 0.05 (0.13)                                     | 0.96 (0.19)                                     |
| 1.5      | 30                | Strong                                         | 1.00 (0.35)                                     | 1.00 (0.20)                                     | 0.06 (0.11)                                     | 1.09 (0.32)                                     |

<sup>[1]</sup>We present the ratios of the measure estimated from a model that ignored the effect modifier to one that included the effect modifier and an interaction term between it and treatment status.

<sup>[2]</sup>Effect modification was classified as weak when  $\beta_w = 1$ ,  $\beta_{xw} = 1$ , as moderate when  $\beta_w = 1$ ,  $\beta_{xw} = 3$ , and as strong when  $\beta_w = 2$ ,  $\beta_{xw} = 5$ .

Table S3: Sensitivity of heterogeneity measures<sup>[3]</sup> ( $\frac{\tau_{mod}^2}{\tau_{crude}^2}$ ) to accounting for effect modification. Median (IQR) was presented.

| $\tau^2$ | Number of studies | Strength of confounding <sup>[4]</sup> | Two-stage approach                                |                                                   | One-stage approach                                |                                                   |
|----------|-------------------|----------------------------------------|---------------------------------------------------|---------------------------------------------------|---------------------------------------------------|---------------------------------------------------|
|          |                   |                                        | $\frac{\tau_{mod}^2}{\tau_{crude}^2}$ (pre = 30%) | $\frac{\tau_{mod}^2}{\tau_{crude}^2}$ (pre = 70%) | $\frac{\tau_{mod}^2}{\tau_{crude}^2}$ (pre = 30%) | $\frac{\tau_{mod}^2}{\tau_{crude}^2}$ (pre = 70%) |
| 0.5      | 15                | Weak                                   | 0.21 (1.00)                                       | 1.00 (0.01)                                       | 1.35 (1.55)                                       | 1.21 (1.12)                                       |
| 1.0      | 15                | Weak                                   | 0.01 (0.85)                                       | 1.00 (1.00)                                       | 1.44 (0.36)                                       | 1.30 (0.59)                                       |
| 1.5      | 15                | Weak                                   | 0.06 (0.78)                                       | 0.64 (1.00)                                       | 1.41 (0.38)                                       | 1.32 (0.36)                                       |
| 0.5      | 15                | Moderate                               | 0.03 (1.00)                                       | 1.00 (0.01)                                       | 0.93 (2.58)                                       | 1.19 (2.38)                                       |
| 1.0      | 15                | Moderate                               | 0.11 (1.00)                                       | 1.00 (0.57)                                       | 2.16 (2.43)                                       | 1.60 (1.39)                                       |
| 1.5      | 15                | Moderate                               | 0.49 (1.05)                                       | 1.00 (0.94)                                       | 2.47 (1.61)                                       | 1.79 (1.02)                                       |
| 0.5      | 15                | Strong                                 | 0.01 (1.00)                                       | 1.00 (0.01)                                       | 1.28 (2.67)                                       | 1.35 (2.40)                                       |
| 1.0      | 15                | Strong                                 | 0.56 (1.00)                                       | 1.00 (0.01)                                       | 2.89 (4.30)                                       | 1.95 (2.43)                                       |
| 1.5      | 15                | Strong                                 | 0.74 (1.48)                                       | 1.00 (0.29)                                       | 3.87 (4.23)                                       | 2.09 (1.75)                                       |
| 0.5      | 30                | Weak                                   | 0.01 (1.00)                                       | 1.00 (0.01)                                       | 1.38 (1.02)                                       | 1.28 (0.93)                                       |
| 1.0      | 30                | Weak                                   | 0.01 (1.00)                                       | 0.43 (1.00)                                       | 1.42 (0.39)                                       | 1.31 (0.37)                                       |
| 1.5      | 30                | Weak                                   | 0.19 (0.62)                                       | 0.28 (0.94)                                       | 1.41 (0.25)                                       | 1.33 (0.26)                                       |
| 0.5      | 30                | Moderate                               | 0.01 (1.00)                                       | 1.00 (0.01)                                       | 1.12 (1.69)                                       | 1.32 (1.62)                                       |
| 1.0      | 30                | Moderate                               | 0.01 (0.98)                                       | 1.00 (1.00)                                       | 2.16 (1.50)                                       | 1.70 (0.87)                                       |
| 1.5      | 30                | Moderate                               | 0.26 (1.00)                                       | 0.98 (1.07)                                       | 2.47 (1.09)                                       | 1.86 (0.66)                                       |
| 0.5      | 30                | Strong                                 | 0.01 (1.00)                                       | 1.00 (0.01)                                       | 1.50 (2.21)                                       | 1.39 (2.19)                                       |
| 1.0      | 30                | Strong                                 | 0.01 (1.00)                                       | 1.00 (0.01)                                       | 2.94 (2.66)                                       | 1.83 (1.23)                                       |
| 1.5      | 30                | Strong                                 | 0.59 (1.41)                                       | 1.00 (0.76)                                       | 3.58 (2.33)                                       | 2.13 (1.03)                                       |

<sup>[3]</sup>We present the ratios of the measure estimated from a model that ignored the effect modifier to one that included the effect modifier and an interaction term between it and treatment status.

<sup>[4]</sup>Effect modification was classified as weak when  $\beta_w = 1$ ,  $\beta_{xw} = 1$ , as moderate when  $\beta_w = 1$ ,  $\beta_{xw} = 3$ , and as strong when  $\beta_w = 2$ ,  $\beta_{xw} = 5$ .
